# Supplementary material
Source: HighWire-hosted journal article supplement (https://bjgp.org/highwire/filestream/40409/field_highwire_adjunct_files/0/bjgp20X713933_suppl.pdf)
Supplement: bjgp20X713933_suppl.pdf [file bjgp20X713933_suppl.pdf]

Supplementary data

Table S1 shows that panellists reached a consensus in 755 (66.58%) scenarios. Of these 6 (0.53%) were rated with disagreement and 383 (33.77%) with an equivocal rating. Of those where agreement was obtained, an appropriate next step was identified in 449 (39.59 %) scenarios. Results are presented as medians to facilitate interpretation.

| Table S1: Summary Table       |                             |        |                    |        |                               |        |                    |        |
|-------------------------------|-----------------------------|--------|--------------------|--------|-------------------------------|--------|--------------------|--------|
| Number of scenarios rated     | Overall Scenarios<br>N=1134 | %      | 12-23 months       |        | 24 months - 4 years 11 months |        | 5-12 years         |        |
|                               |                             |        | Scenarios<br>N=378 | %      | Scenarios<br>N=378            | %      | Scenarios<br>N=378 | %      |
| 1-2-3 with agreement          | 296                         | 26.10% | 101                | 26.72% | 93                            | 24.60% | 102                | 26.98% |
| 1-2-3 without agreement       | 73                          | 6.44%  | 26                 | 6.88%  | 30                            | 7.94%  | 17                 | 4.50%  |
| 4-5-6 with agreement          | 10                          | 0.88%  | 1                  | 0.26%  | 2                             | 0.53%  | 7                  | 1.85%  |
| 4-5-6 without agreement       | 140                         | 12.35% | 36                 | 9.52%  | 44                            | 11.64% | 60                 | 15.87% |
| 7-8-9 with agreement          | 449                         | 39.59% | 156                | 41.27% | 150                           | 39.68% | 143                | 37.83% |
| 7-8-9 without agreement       | 166                         | 14.64% | 58                 | 15.34% | 59                            | 15.61% | 49                 | 12.96% |
| 1 with agreement              | 246                         | 21.69% | 86                 | 22.75% | 82                            | 0      | 78                 | 20.63% |
| 1 without agreement           | 1                           | 0.09%  | 1                  | 0.26%  | 0                             | 0      | 0                  | 0.00%  |
| 9 with agreement              | 2                           | 0.18%  | 0                  | 0.00%  | 0                             | 0.00%  | 2                  | 0.53%  |
| 9 without agreement           | 0                           | 0.00%  | 0                  | 0.00%  | 0                             | 0.00%  | 0                  | 0.00%  |
| <b>Irrespective of median</b> |                             |        |                    |        |                               |        |                    |        |
| Total agreement               | 755                         | 66.58% | 258                | 68.25% | 245                           | 64.81% | 252                | 66.67% |
| Total disagreement            | 6                           | 0.53%  | 2                  | 0.53%  | 0                             | 0.00%  | 4                  | 1.06%  |
| Total equivocation*           | 383                         | 33.77% | 119                | 31.48% | 135                           | 35.71% | 129                | 34.13% |

For Table S1 Percentages are taken from the total number of scenarios with each number of symptoms.

| Next Step          | 1     |        | 2    |        | 3     |        | 4    |        | 5    |         | 6    |        |
|--------------------|-------|--------|------|--------|-------|--------|------|--------|------|---------|------|--------|
|                    | N =36 | %      | N=90 | %      | N=120 | %      | N=90 | %      | N=36 | %       | N=12 | %      |
| Self-care (7-9)    | 10    | 27.78% | 4    | 4.44%  | 0     | 0.00%  | 0    | 0.00%  | 0    | 0.00%   | 0    | 0.00%  |
| Go to the GP (7-9) | 13    | 36.11% | 74   | 82.22% | 110   | 91.67% | 73   | 81.11% | 15   | 41.67%  | 0    | 0.00%  |
| Go to A&E (7-8)    | 2     | 5.56%  | 11   | 12.22% | 51    | 43.33% | 44   | 48.89% | 36   | 100.00% | 5    | 13.89% |
| Call 999 (9)       | 0     | 0.00%  | 0    | 0.00%  | 0     | 0.00%  | 0    | 0.00%  | 0    | 0.00%   | 1    | 16.67% |

| Table S3: Breakdown of how symptoms were rated by the panel as self-care most likely to be appropriate |                                 |          |       |                      |       |                                                |       |            |       |                               |   |                     |   |
|--------------------------------------------------------------------------------------------------------|---------------------------------|----------|-------|----------------------|-------|------------------------------------------------|-------|------------|-------|-------------------------------|---|---------------------|---|
| Number of symptoms                                                                                     | Past Medical history            | Ear pain |       | Reduced fluid intake |       | Less active or socially interactive than usual |       | High fever |       | Wheezing or “noisy breathing” |   | Shortness of breath |   |
|                                                                                                        |                                 | N        | %     | N                    | %     | N                                              | %     | N          | %     | N                             | % | N                   | % |
| 1                                                                                                      | None <sup>A</sup>               | 3        | 100   | 1                    | 33.33 | 1                                              | 33.33 | 1          | 33.33 |                               |   |                     |   |
|                                                                                                        | Previous admission <sup>B</sup> | 2        | 66.67 |                      |       | 1                                              | 33.33 | 1          | 33.33 |                               |   |                     |   |
| 2                                                                                                      | None <sup>A</sup>               | 2        | 13.33 | 1                    | 6.67  | 1                                              | 6.67  |            |       |                               |   |                     |   |
|                                                                                                        | Previous admission <sup>B</sup> | 2        | 13.33 | 1                    | 6.67  | 1                                              | 6.67  |            |       |                               |   |                     |   |
| 3                                                                                                      | None <sup>A</sup>               |          |       |                      |       |                                                |       |            |       |                               |   |                     |   |
|                                                                                                        | Previous admission <sup>B</sup> |          |       |                      |       |                                                |       |            |       |                               |   |                     |   |
| 4                                                                                                      | None <sup>A</sup>               |          |       |                      |       |                                                |       |            |       |                               |   |                     |   |
|                                                                                                        | Previous admission <sup>B</sup> |          |       |                      |       |                                                |       |            |       |                               |   |                     |   |
| 5                                                                                                      | None <sup>A</sup>               |          |       |                      |       |                                                |       |            |       |                               |   |                     |   |
|                                                                                                        | Previous admission <sup>B</sup> |          |       |                      |       |                                                |       |            |       |                               |   |                     |   |
| 6                                                                                                      | None <sup>A</sup>               |          |       |                      |       |                                                |       |            |       |                               |   |                     |   |
|                                                                                                        | Previous admission <sup>B</sup> |          |       |                      |       |                                                |       |            |       |                               |   |                     |   |

<sup>A</sup> Previously well aside from usual childhood illnesses  
<sup>B</sup> For asthma, bronchiolitis or other respiratory condition  
<sup>C</sup> Blocked out cells (N= 0), light grey (50%), dark grey (>50%)

| Table S4: Breakdown of how symptoms were rated by the panel as most likely to be appropriate for accessing the GP |                                 |          |       |                      |       |                                                |       |            |       |                               |       |                     |       |
|-------------------------------------------------------------------------------------------------------------------|---------------------------------|----------|-------|----------------------|-------|------------------------------------------------|-------|------------|-------|-------------------------------|-------|---------------------|-------|
| Number of symptoms                                                                                                | Past Medical history            | Ear pain |       | Reduced fluid intake |       | Less active or socially interactive than usual |       | High Fever |       | Wheezing or “noisy breathing” |       | Shortness of breath |       |
|                                                                                                                   |                                 | N        | %     | N                    | %     | N                                              | %     | N          | %     | N                             | %     | N                   | %     |
| 1                                                                                                                 | None <sup>A</sup>               |          |       |                      |       |                                                |       | 1          | 33.33 | 1                             | 33.33 | 3                   | 100   |
|                                                                                                                   | Previous admission <sup>B</sup> |          |       |                      |       |                                                |       | 2          | 66.67 | 3                             | 100   | 3                   | 100   |
| 2                                                                                                                 | None <sup>A</sup>               | 7        | 46.67 | 12                   | 80    | 12                                             | 80    | 15         | 100   | 13                            | 86.67 | 15                  | 100   |
|                                                                                                                   | Previous admission <sup>B</sup> | 8        | 53.33 | 12                   | 80    | 10                                             | 66.67 | 15         | 100   | 14                            | 93.33 | 13                  | 86.67 |
| 3                                                                                                                 | None <sup>A</sup>               | 30       | 100   | 28                   | 93.33 | 27                                             | 90    | 30         | 100   | 25                            | 83.33 | 25                  | 83.33 |
|                                                                                                                   | Previous admission <sup>B</sup> | 30       | 100   | 28                   | 93.33 | 27                                             | 90    | 30         | 100   | 25                            | 83.33 | 25                  | 83.33 |
| 4                                                                                                                 | None <sup>A</sup>               | 29       | 96.67 | 26                   | 86.67 | 24                                             | 80    | 27         | 90    | 23                            | 76.67 | 23                  | 76.67 |
|                                                                                                                   | Previous admission <sup>B</sup> | 29       | 96.67 | 23                   | 76.67 | 21                                             | 70    | 24         | 80    | 23                            | 76.67 | 20                  | 66.67 |
| 5                                                                                                                 | None <sup>A</sup>               | 8        | 53.33 | 8                    | 53.33 | 6                                              | 40    | 8          | 53.33 | 5                             | 33.33 | 5                   | 33.33 |
|                                                                                                                   | Previous admission <sup>B</sup> | 7        | 46.67 | 7                    | 46.67 | 5                                              | 33.33 | 7          | 46.67 | 4                             | 26.67 | 5                   | 33.33 |
| 6                                                                                                                 | None <sup>A</sup>               |          |       |                      |       |                                                |       |            |       |                               |       |                     |       |
|                                                                                                                   | Previous admission <sup>B</sup> |          |       |                      |       |                                                |       |            |       |                               |       |                     |       |

<sup>A</sup> Previously well aside from usual childhood illnesses  
<sup>B</sup> For asthma, bronchiolitis or other respiratory condition  
<sup>C</sup> Blocked out cells (N= 0), Light grey (50%), dark grey (>50%)

Table S5: Breakdown of how symptoms were rated by the panel as most likely to be appropriate for attending A&E

| Number of symptoms | Past Medical history            | Ear pain |       | Reduced fluid intake |       | Less active or socially interactive than usual |       | High Fever |       | Wheezing or “noisy breathing” |       | Shortness of breath |       |
|--------------------|---------------------------------|----------|-------|----------------------|-------|------------------------------------------------|-------|------------|-------|-------------------------------|-------|---------------------|-------|
|                    |                                 | N        | %     | N                    | %     | N                                              | %     | N          | %     | N                             | %     | N                   | %     |
| 1                  | None <sup>A</sup>               |          |       |                      |       |                                                |       |            |       |                               |       | 1                   | 33.33 |
|                    | Previous admission <sup>B</sup> |          |       |                      |       |                                                |       |            |       |                               |       | 1                   | 33.33 |
| 2                  | None <sup>A</sup>               |          |       |                      |       |                                                |       |            |       | 1                             | 6.67  | 1                   | 6.67  |
|                    | Previous admission <sup>B</sup> |          |       | 3                    | 20    |                                                |       | 4          | 26.67 | 6                             | 40.00 | 7                   | 46.67 |
| 3                  | None <sup>A</sup>               | 4        | 13.33 | 5                    | 16.67 | 3                                              | 10    | 7          | 23.33 | 11                            | 36.67 | 15                  | 50    |
|                    | Previous admission <sup>B</sup> | 9        | 30.00 | 12                   | 40    | 10                                             | 33.33 | 11         | 36.67 | 16                            | 53.33 | 23                  | 76.67 |
| 4                  | None <sup>A</sup>               | 9        | 30.00 | 11                   | 36.67 | 11                                             | 36.67 | 13         | 43.33 | 17                            | 56.67 | 19                  | 63.33 |
|                    | Previous admission <sup>B</sup> | 11       | 36.67 | 14                   | 46.67 | 13                                             | 43.33 | 14         | 46.67 | 19                            | 63.33 | 21                  | 70.00 |
| 5                  | None <sup>A</sup>               | 15       | 100   | 15                   | 100   | 15                                             | 100   | 15         | 100   | 15                            | 100   | 15                  | 100   |
|                    | Previous admission <sup>B</sup> | 15       | 100   | 15                   | 100   | 15                                             | 100   | 15         | 100   | 15                            | 100   | 15                  | 100   |
| 6                  | None <sup>A</sup>               | 3        | 100   | 3                    | 100   | 3                                              | 100   | 3          | 100   | 3                             | 100   | 3                   | 100   |
|                    | Previous admission <sup>B</sup> | 2        | 66.67 | 2                    | 66.67 | 2                                              | 66.67 | 2          | 66.67 | 2                             | 66.67 | 2                   | 66.67 |

<sup>A</sup> Previously well aside from usual childhood illnesses

<sup>B</sup> For asthma, bronchiolitis or other respiratory condition

<sup>C</sup> Blocked out cells (N= 0), Light grey (50%), dark grey (>50%)
